# Supplementary material for: Developing a Test of Scientific Literacy Skills (TOSLS): Measuring Undergraduates’ Evaluation of Scientific Information and Arguments
Source: Atypon-hosted journal article supplement (doi:10.1187/cbe.12-03-0026), 2012-12-01
Supplement: combinedsupmats3.pdf [file combinedsupmats3.pdf]

### Appendix C: TOSLS Skills and Answer Key (28Qs)

| SKILL              | DESCRIPTION                                                                                                                                                                                                       | Question | Correct Answer |
|--------------------|-------------------------------------------------------------------------------------------------------------------------------------------------------------------------------------------------------------------|----------|----------------|
| <b>1</b><br>(3 Qs) | Identify a valid scientific argument (e.g., recognizing when scientific evidence supports a hypothesis)                                                                                                           | 1        | B              |
|                    |                                                                                                                                                                                                                   | 8        | D              |
|                    |                                                                                                                                                                                                                   | 11       | B              |
| <b>2</b><br>(5 Qs) | Conduct an effective literature search (e.g. Evaluate the validity of sources (e.g., websites, peer reviewed journals) and distinguish between types of sources)                                                  | 10       | B              |
|                    |                                                                                                                                                                                                                   | 12       | C              |
|                    |                                                                                                                                                                                                                   | 17       | B              |
|                    |                                                                                                                                                                                                                   | 22       | C              |
|                    |                                                                                                                                                                                                                   | 26       | C              |
| <b>3</b><br>(3 Qs) | Evaluate the use and misuse of scientific information (e.g. Recognize a valid scientific course of action, distinguish the appropriate use of science to make societal decisions)                                 | 5        | D              |
|                    |                                                                                                                                                                                                                   | 9        | B              |
|                    |                                                                                                                                                                                                                   | 27       | B              |
| <b>4</b><br>(4 Qs) | Understand elements of research design and how they impact scientific findings/conclusions (e.g. identify strengths and weaknesses in research related to bias, sample size, randomization, experimental control) | 4        | C              |
|                    |                                                                                                                                                                                                                   | 13       | D              |
|                    |                                                                                                                                                                                                                   | 14       | C              |
|                    |                                                                                                                                                                                                                   | 25       | B              |
| <b>5</b><br>(1Q)   | Make a graph                                                                                                                                                                                                      | 15       | D              |
| <b>6</b><br>(4 Qs) | Read and interpret graphical representations of data                                                                                                                                                              | 2        | C              |
|                    |                                                                                                                                                                                                                   | 6        | C              |
|                    |                                                                                                                                                                                                                   | 7        | A              |
|                    |                                                                                                                                                                                                                   | 18       | A              |
| <b>7</b><br>(3 Qs) | Solve problems using quantitative skills, including probability and statistics (e.g calculate means, probabilities, percentages, frequencies)                                                                     | 16       | B              |
|                    |                                                                                                                                                                                                                   | 20       | B              |
|                    |                                                                                                                                                                                                                   | 23       | D              |
| <b>8</b><br>(3 Qs) | Understand and interpret basic statistics (e.g. interpret error bars, understand the need for statistics)                                                                                                         | 3        | B              |
|                    |                                                                                                                                                                                                                   | 19       | C              |
|                    |                                                                                                                                                                                                                   | 24       | D              |
| <b>9</b><br>(2 Qs) | Justify inferences, predictions, and conclusions based on quantitative data                                                                                                                                       | 21       | C              |
|                    |                                                                                                                                                                                                                   | 28       | B              |
