# Supplementary material for: Developing a Test of Scientific Literacy Skills (TOSLS): Measuring Undergraduates’ Evaluation of Scientific Information and Arguments
Source: Atypon-hosted journal article supplement (doi:10.1187/cbe.12-03-0026), 2012-12-01
Supplement: combinedsupmats4.pdf [file combinedsupmats4.pdf]

## Appendix D: Student Interview Scoring Rubric

| Skill              | Correct reasoning                                                                                                                                                                                                                                                                                                                                                                                                          | Question | Correct Answer |
|--------------------|----------------------------------------------------------------------------------------------------------------------------------------------------------------------------------------------------------------------------------------------------------------------------------------------------------------------------------------------------------------------------------------------------------------------------|----------|----------------|
| <b>1</b><br>(3 Qs) | Evaluation of hypothesis with experiment; empirical test; draws conclusion that is based on strong evidence; provides reasoning for evaluating evidence; Evaluates the experimental design, recognizing confounds or need for random selection, or other independent variables                                                                                                                                             | 1        | B              |
|                    |                                                                                                                                                                                                                                                                                                                                                                                                                            | 8        | D              |
|                    |                                                                                                                                                                                                                                                                                                                                                                                                                            | 11       | B              |
| <b>2</b><br>(5 Qs) | Recognize sources of bias; quoting researcher does not indicate primary source; reviews are not primary; media reports are tertiary; peer review and importance of evaluation by 3rd party experts                                                                                                                                                                                                                         | 10       | B              |
|                    |                                                                                                                                                                                                                                                                                                                                                                                                                            | 12       | C              |
|                    |                                                                                                                                                                                                                                                                                                                                                                                                                            | 17       | B              |
|                    |                                                                                                                                                                                                                                                                                                                                                                                                                            | 22       | C              |
| <b>3</b><br>(3 Qs) | Recognize bias political or financial influences should not used to pressure findings, conclusions, reporting, or social decisions; decisions should be based on evidence; questionable ethics of publishing work that has not been verified; questionable ethics of distributing materials to bias participants; questionable ethics of rejecting studies based on controversy                                            | 5        | D              |
|                    |                                                                                                                                                                                                                                                                                                                                                                                                                            | 9        | B              |
|                    |                                                                                                                                                                                                                                                                                                                                                                                                                            | 27       | B              |
| <b>4</b><br>(4 Qs) | No confounding factors (e.g., differences in sample size, sample selection, sample makeup); an explanation of how controls are used to mediate confounding factors; identifying strengths and weaknesses of experimental design (e.g., random assignment to control and treatment groups)                                                                                                                                  | 4        | C              |
|                    |                                                                                                                                                                                                                                                                                                                                                                                                                            | 13       | D              |
|                    |                                                                                                                                                                                                                                                                                                                                                                                                                            | 14       | C              |
|                    |                                                                                                                                                                                                                                                                                                                                                                                                                            | 25       | B              |
| <b>5</b><br>(1Q)   | Histogram is the best way to compare means                                                                                                                                                                                                                                                                                                                                                                                 | 15       | D              |
| <b>6</b><br>(4 Qs) | Given data, be able to explain what the general shape of the graph would be (exponential/logarithmic vs linear); explain why the other shapes are not correct; interpret the graph and infer cause (e.g., pesticide killed the beetles which caused more tadpoles to be eaten); extract numerical information from graph and use that to make comparisons or conclusions; interpret shape of a graph to reach a conclusion | 2        | C              |
|                    |                                                                                                                                                                                                                                                                                                                                                                                                                            | 6        | C              |
|                    |                                                                                                                                                                                                                                                                                                                                                                                                                            | 7        | A              |
|                    |                                                                                                                                                                                                                                                                                                                                                                                                                            | 18       | A              |
| <b>7</b><br>(3 Qs) | Solve algebraic calculations accurately                                                                                                                                                                                                                                                                                                                                                                                    | 16       | B              |
|                    |                                                                                                                                                                                                                                                                                                                                                                                                                            | 20       | B              |
|                    |                                                                                                                                                                                                                                                                                                                                                                                                                            | 23       | D              |

**Appendix D: Student Interview Scoring Rubric**

|                    |                                                                                                                                                                                                                                                                   |    |   |
|--------------------|-------------------------------------------------------------------------------------------------------------------------------------------------------------------------------------------------------------------------------------------------------------------|----|---|
|                    |                                                                                                                                                                                                                                                                   |    |   |
| <b>8</b><br>(3 Qs) | Give measure of reliability such as use of statistical tests to define probability and certainty; how sample size effects certainty; Recognize that researchers use statistics to make inferences about a population using a sample of that population            | 3  | B |
|                    |                                                                                                                                                                                                                                                                   | 19 | C |
|                    |                                                                                                                                                                                                                                                                   | 24 | D |
| <b>9</b><br>(2 Qs) | Recognize or use reasoning to explain that correlation does not imply causation; using information from a graph to explain why they chose an answer that they did (e.g., the graph showed elevation and mean number of shrimp rather than having fewer predators) | 21 | C |
|                    |                                                                                                                                                                                                                                                                   | 28 | B |
